# Supplementary material
Source: MDPI journal article supplement (https://www.mdpi.com/1999-4907/9/6/333)

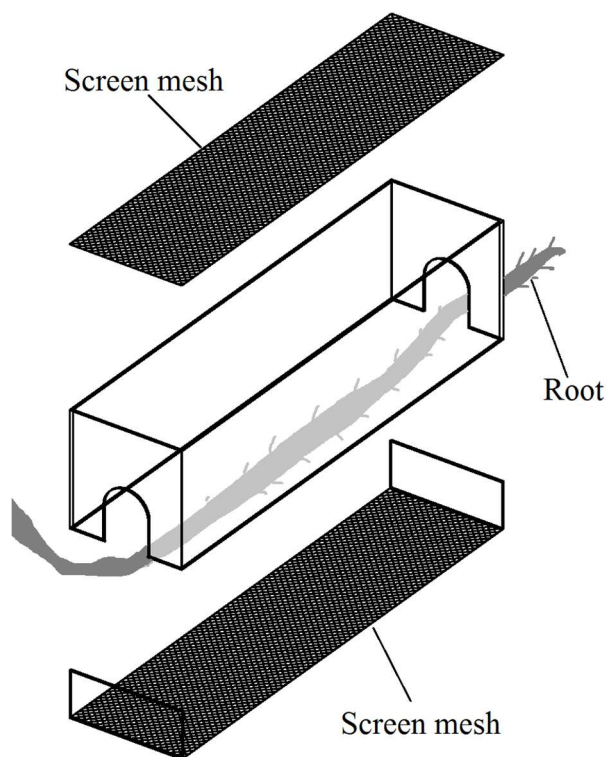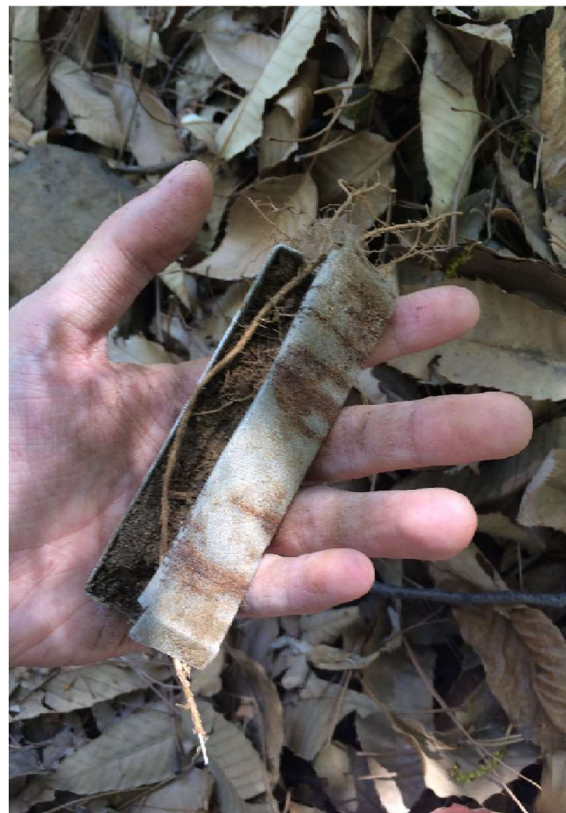

Figure S1: Experimental devices for sampling.

Supplement: s1 [file s1]
